# Supplementary material for: Streptomyces chiangmaiensisSSUT88A mediated green synthesis of silver nanoparticles: characterization and evaluation of antibacterial action against clinical drug-resistant strains
Source: Royal Society of Chemistry journal article supplement (doi:10.1039/d1ra08238h), 2022-01-01

### Electronic Supplementary Information

#### ***Streptomyces chiangmaiensis* SSUT88A mediated green synthesis of silver nanoparticles: characterization and evaluation of antibacterial action against clinical-drug resistant strains**

A'liyatur Rosyidah<sup>a,b</sup>, Oratai Weeranantanapan<sup>a,c</sup>, Nuannoi Chudapongse<sup>a,c</sup>, Wanwisa Limphirat<sup>d</sup>, and Nawarat Nantapong<sup>\*a,c</sup>

<sup>a</sup>. School of Preclinical Sciences, Institute of Sciences, Suranaree University of Technology, Nakhon Ratchasima 30000, Thailand

<sup>b</sup>. Research Center for Biology, National Research and Innovation Agency (BRIN), West Java 16911, Indonesia

<sup>c</sup>. Center of Excellent on Advanced Functional Materials, Suranaree University of Technology, Nakhon Ratchasima 30000, Thailand

<sup>d</sup>. Synchrotron Light Research Institute (SLRI), Nakhon Ratchasima 30000, Thailand

\* Corresponding author:

Tel. or fax: +66. *E-mail address:* [nawarat@sut.ac.th](mailto:nawarat@sut.ac.th) (Nawarat Nantapong)



**Table S1.** Antimicrobial activity of IS-AgNPs after storage at 4°C and room temperature.

To determine the stability of IS-AgNPs after storage at 4°C for five months and room temperature (30-35°C) for one month, the antimicrobial activity of IS-AgNPs was measured by agar-well diffusion method. The experiments were performed in triplicate. The antimicrobial activity of IS-AgNPs was statistically analysed using one-way analysis of variance (ANOVA) in IBM SPSS Statistics Version 23. To determine the significant difference between groups, Tukey's test was applied with  $p < 0.05$ . There is no significant statistical difference in the antimicrobial activity of IS-AgNPs stored at 4°C and room temperature (30-35°C).

| Test pathogen              | Inhibition zone (mm)  |                       |                        |
|----------------------------|-----------------------|-----------------------|------------------------|
|                            | Before                | After                 |                        |
|                            |                       | 4°C (5 months)        | 30-35°C (1 month)      |
| MDR <i>A. baumannii</i>    | 20.3±1.7 <sup>a</sup> | 20.0±1.7 <sup>a</sup> | 19.0±1.7 <sup>a</sup>  |
| <i>K. pneumoniae</i> 1617  | 12.6±1.5 <sup>a</sup> | 12.3±0.5 <sup>a</sup> | 10.6±1.5 <sup>a</sup>  |
| <i>P. aeruginosa</i> N90PS | 20.3±0.5 <sup>a</sup> | 20.0±1.7 <sup>a</sup> | 17.6±1.15 <sup>a</sup> |
| <i>E. coli</i> 8465        | 21.0±1.7 <sup>a</sup> | 21.3±1.5 <sup>a</sup> | 20.6±0.5 <sup>a</sup>  |

**Fig S1.** UV-Vis spectra of IS-AgNPs before and after five months storage at 4°C.

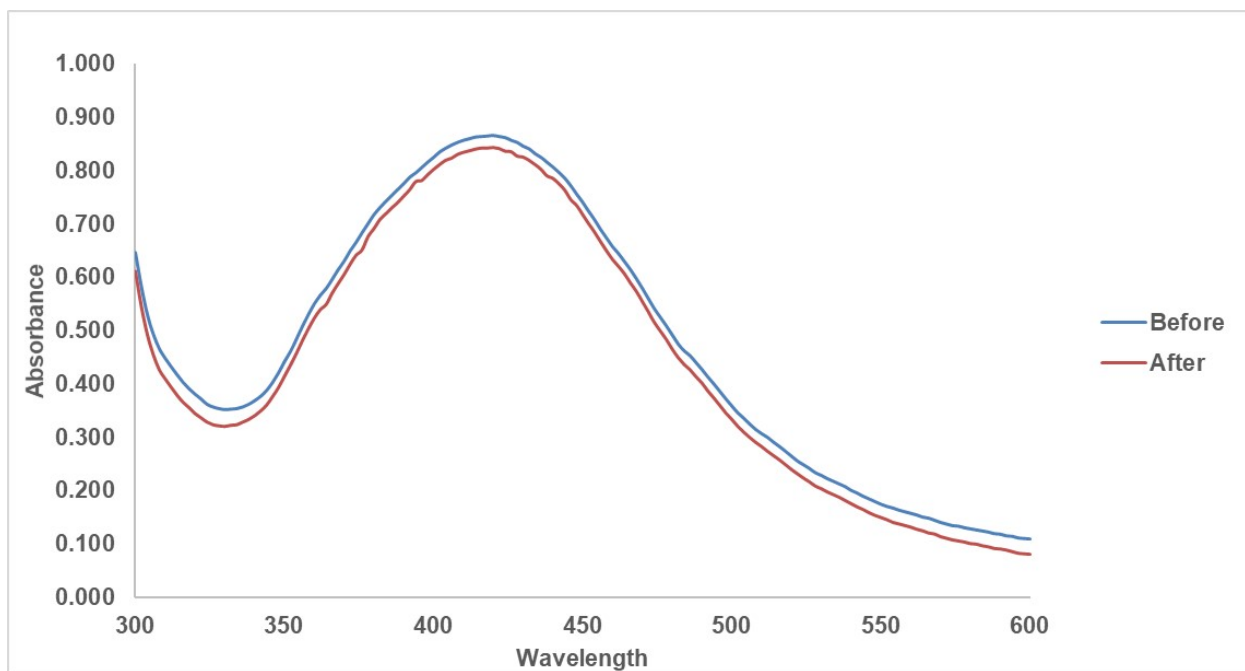

Supplement: d1ra08238h1.pdf [file d1ra08238h1.pdf]
